# Supplementary figures and images for: Systems biology-based discovery of a potential Atg4B agonist (Flubendazole) that induces autophagy in breast cancer
Source: Royal Society of Chemistry journal article supplement (doi:10.1039/c5mb00466g), 2015-08-12

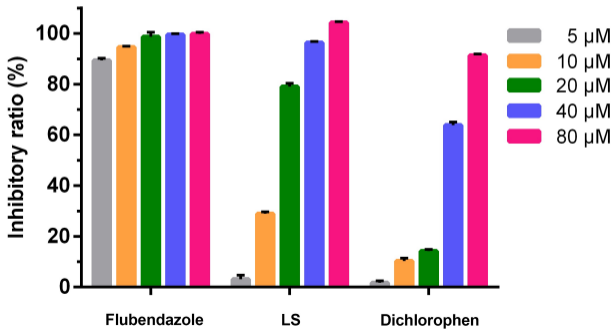

Supplement: c5mb00466g2.pdf [file c5mb00466g2.pdf]
